# Supplementary material for: Synthesis and photochromic studies of η6-mesitylene ruthenium(ii) complexes bearing N-heterocyclic carbene ligands with the dithienylethene moiety
Source: Royal Society of Chemistry journal article supplement (doi:10.1039/c1nj20161a), 2011-01-01

## **Synthesis and Photochromic Studies of $\eta^6$ -Mesitylene Ruthenium(II) Complexes Bearing N-Heterocyclic Carbene Ligands with Dithienylethene Moiety**

Gongping Duan, Wing-Tak Wong and Vivian Wing-Wah Yam\*

*Institute of Molecular Functional Materials,<sup>†</sup> and Department of Chemistry, The University of Hong Kong, Pokfulam Road, Hong Kong, P. R. China.*

<sup>†</sup> Areas of Excellence Scheme, University Grants Committee (Hong Kong)

\* To whom corresponding should be addressed. Email: [wwyam@hku.hk](mailto:wwyam@hku.hk)

Dedicated to Professor Didier Astruc on the occasion of his 65<sup>th</sup> birthday

### **Electronic Supporting Information**

### X-Ray Crystallography

Crystals of **3** (0.20 × 0.30 × 0.39 mm) and **6** (0.14 × 0.15 × 0.49 mm) mounted in a glass capillary were used for data collection at 305 K on a Bruker Smart CCD 1000 using graphite monochromatized Mo-K $\alpha$  radiation ( $\lambda = 0.71073 \text{ \AA}$ ). Raw frame data were integrated with SAINT program.<sup>[34a]</sup> Semi-empirical absorption correction with SADABS<sup>[34b]</sup> was applied. The structure was solved by direct methods employing SHELXS-97 program<sup>[34c]</sup> and expanded using Fourier techniques. All non-H atoms were refined anisotropically. All of the C-bound H atoms were observable from difference Fourier map but were all placed at geometrical positions with C–H = 0.93, 0.96, 0.97 Å for phenyl, methyl and methylene H-atoms. The positions of H atoms were calculated based on riding mode with  $U_{\text{iso}}(\text{H}) = 1.2U_{\text{eq}}(\text{Carrier})$ . For complex **3**, both PF $_6^-$  ions are found to lie about the two-fold axes, while the complex and the water molecule both lie in general positions in the asymmetric unit. For complex **6**, 18 restraints have been used in the refinement since the fluorine atoms in the PF $_6^-$  ion are found to show high rotational disorder. Isotropic restraints with standard deviation of 0.005 for the three fluorine atoms, F1, F2 and F3, in the anisotropic atom displacement components have been used (six restraints for each fluorine atom).

**Table S1** Crystal determination data of **3**

---

|                                      |                                                              |                            |
|--------------------------------------|--------------------------------------------------------------|----------------------------|
| Empirical formula                    | $C_{31}H_{37}ClF_6N_3OPRuS_2 \cdot (H_2O)_{0.5}$             |                            |
| Formula weight                       | 822.25                                                       |                            |
| Temperature                          | 305(2) K                                                     |                            |
| Wavelength                           | 0.71073 Å                                                    |                            |
| Crystal system                       | Monoclinic                                                   |                            |
| Space group                          | C2/c                                                         |                            |
| Unit cell dimensions                 | $a = 18.598(7)$ Å                                            | $\alpha = 90^\circ$        |
|                                      | $b = 17.640(7)$ Å                                            | $\beta = 102.867(5)^\circ$ |
|                                      | $c = 22.631(8)$ Å                                            | $\gamma = 90^\circ$        |
| Volume                               | 7238(5) Å <sup>3</sup>                                       |                            |
| Z                                    | 8                                                            |                            |
| Density (calculated)                 | 1.509 g cm <sup>-3</sup>                                     |                            |
| Absorption coefficient               | 0.73 mm <sup>-1</sup>                                        |                            |
| $F(000)$                             | 3352                                                         |                            |
| Crystal size                         | 0.39 mm × 0.30 mm × 0.20 mm                                  |                            |
| Theta range for data collection      | 1.7 to 28.3°                                                 |                            |
| Index ranges                         | $-22 \leq h \leq 20, -21 \leq k \leq 21, -23 \leq l \leq 27$ |                            |
| Reflections collected                | 20165                                                        |                            |
| Independent reflections              | 6867 [ $R_{int} = 0.019$ ]                                   |                            |
| Absorption correction                | multi-scan                                                   |                            |
| Max. and min. transmission           | 0.868 and 0.764                                              |                            |
| Refinement method                    | Full-matrix least-squares on $F^2$                           |                            |
| Data / restraints / parameters       | 6867 / 30 / 437                                              |                            |
| Goodness-of-fit on $F^2$             | 1.04                                                         |                            |
| Final R indices [ $I > 2\sigma(I)$ ] | $R_1 = 0.055, wR_2 = 0.173$                                  |                            |
| Largest diff. peak and hole          | 1.85 and $-1.16$ e·Å <sup>-3</sup>                           |                            |

---

**Table S2** Crystal determination data of **6**

---

|                                             |                                                                                                      |                     |
|---------------------------------------------|------------------------------------------------------------------------------------------------------|---------------------|
| Empirical formula                           | C <sub>30</sub> H <sub>35</sub> ClF <sub>6</sub> N <sub>3</sub> OPRuS <sub>2</sub> ·H <sub>2</sub> O |                     |
| Formula weight                              | 817.24                                                                                               |                     |
| Temperature                                 | 305(2) K                                                                                             |                     |
| Wavelength                                  | 0.71073 Å                                                                                            |                     |
| Crystal system                              | Orthorhombic                                                                                         |                     |
| Space group                                 | <i>Pbca</i>                                                                                          |                     |
| Unit cell dimensions                        | $a = 17.267(3)$ Å                                                                                    | $\alpha = 90^\circ$ |
|                                             | $b = 14.598(2)$ Å                                                                                    | $\beta = 90^\circ$  |
|                                             | $c = 31.643(5)$ Å                                                                                    | $\gamma = 90^\circ$ |
| Volume                                      | 7976(2) Å <sup>3</sup>                                                                               |                     |
| Z                                           | 8                                                                                                    |                     |
| Density (calculated)                        | 1.361 g cm <sup>-3</sup>                                                                             |                     |
| Absorption coefficient                      | 0.66 mm <sup>-1</sup>                                                                                |                     |
| <i>F</i> (000)                              | 3328                                                                                                 |                     |
| Crystal size                                | 0.49 mm × 0.15 mm × 0.14 mm                                                                          |                     |
| Theta range for data collection             | 1.9 to 25.7°                                                                                         |                     |
| Index ranges                                | $-21 \leq h \leq 20$ , $-17 \leq k \leq 17$ , $-37 \leq l \leq 38$                                   |                     |
| Reflections collected                       | 44148                                                                                                |                     |
| Independent reflections                     | 7538 [ $R_{\text{int}} = 0.087$ ]                                                                    |                     |
| Absorption correction                       | multi-scan                                                                                           |                     |
| Max. and min. transmission                  | 0.913 and 0.738                                                                                      |                     |
| Refinement method                           | Full-matrix least-squares on $F^2$                                                                   |                     |
| Data / restraints / parameters              | 7538 / 18 / 425                                                                                      |                     |
| Goodness-of-fit on $F^2$                    | 1.14                                                                                                 |                     |
| Final <i>R</i> indices [ $I > 2\sigma(I)$ ] | $R_1 = 0.099$ , $wR_2 = 0.272$                                                                       |                     |
| Largest diff. peak and hole                 | 1.14 and $-2.26$ e·Å <sup>-3</sup>                                                                   |                     |

---

**Figure S1** Variable-temperature  $^1\text{H}$  NMR spectra of **9** in  $\text{CDCl}_3$  (in the region of  $\delta = 3.6$ - $9.5$  ppm). The asterisk denotes an unknown impurity

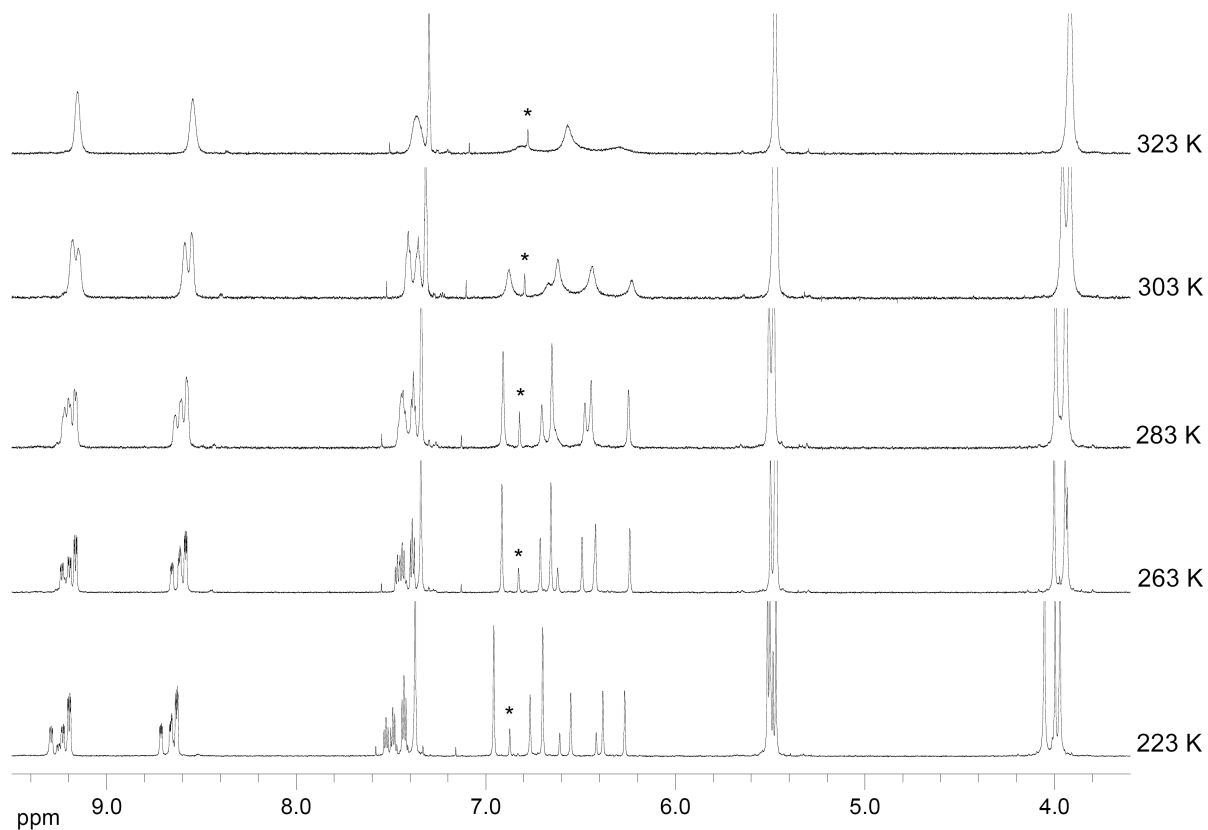

**Figure S2** Schematic structure of the four conformations that were involved in the interconversion. The horizontal line represents the plane of the chelating ligand with the *N*-heterocyclic carbene ligand at the front and the imine ligand on the right-hand side. The cross point of the horizontal and vertical lines represents the metal center adopting a quasi-octahedral structure. The quarter-circle represents the mesitylene ring. The two vertical C–H bonds represent protons on the two thiophene rings adopting parallel or anti-parallel conformations. Each conformation exists as a 1:1 mixture of a pair of enantiomers that are not resolvable in the  $^1\text{H}$  NMR spectra

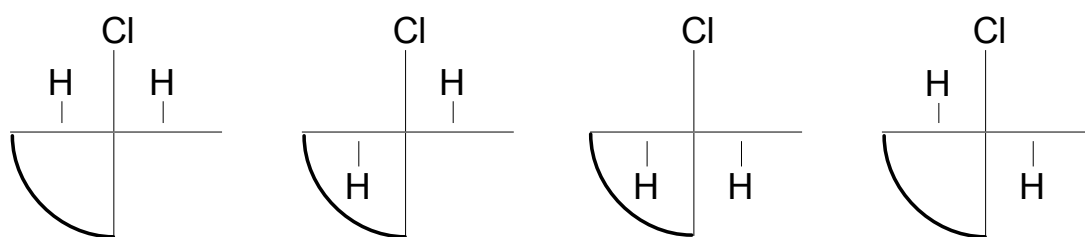

Supplement: c1nj20161a.pdf [file c1nj20161a.pdf]
